# Supplementary material
Source: PubMed Central journal article supplement (PMC5378535)
Supplement: supp_5.1.E52_2016-0056-1-at.pdf [file supp_5.1.E52_2016-0056-1-at.pdf]

**Appendix 1 (as supplied by the authors): ATC Level 5 codes identifying benzodiazepine and z-drug dispensations**

| <b>ATC 5 CODE</b> | <b>ATC 5 NAME</b>     | <b>Drug Class</b> |
|-------------------|-----------------------|-------------------|
| N03AE01           | CLONAZEPAM            | Benzodiazepines   |
| N05BA01           | DIAZEPAM              | Benzodiazepines   |
| N05BA02           | CHLORDIAZEPOXIDE      | Benzodiazepines   |
| N05BA05           | CLORAZEPATE POTASSIUM | Benzodiazepines   |
| N05CD01           | FLURAZEPAM            | Benzodiazepines   |
| N05BA04           | OXAZEPAM              | Benzodiazepines   |
| N05BA06           | LORAZEPAM             | Benzodiazepines   |
| N05BA12           | ALPRAZOLAM            | Benzodiazepines   |
| N05CD05           | TRIAZOLAM             | Benzodiazepines   |
| N05CD07           | TEMAZEPAM             | Benzodiazepines   |
| N05BA08           | BROMAZEPAM            | Benzodiazepines   |
| N05CD02           | NITRAZEPAM            | Benzodiazepines   |
| N05CF01           | ZOPICLONE             | Z-drugs           |
| N05CF02           | ZOLPIDEM              | Z-drugs           |
| N05CF03           | ZALEPLON              | Z-drugs           |
