# Supplementary material
Source: PubMed Central journal article supplement (PMC5378535)
Supplement: supp_5.1.E52_2016-0056-2-at.pdf [file supp_5.1.E52_2016-0056-2-at.pdf]

**Appendix 2 (as supplied by the authors): Supplemental figures**

*Supplemental Figure 1A: Age profile of the population of community-dwelling, long-term sedative users, women aged 18 and older, British Columbia, 2013*

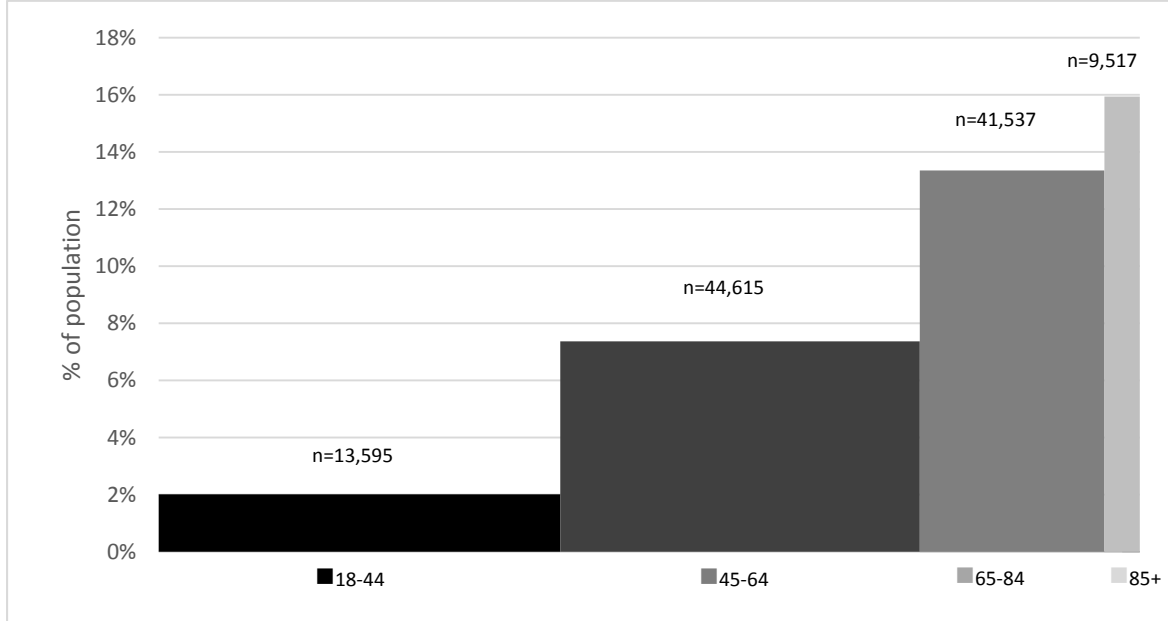

*Supplemental Figure 1B: Age profile of the population of community-dwelling, long-term sedative users, men aged 18 and older, British Columbia, 2013*

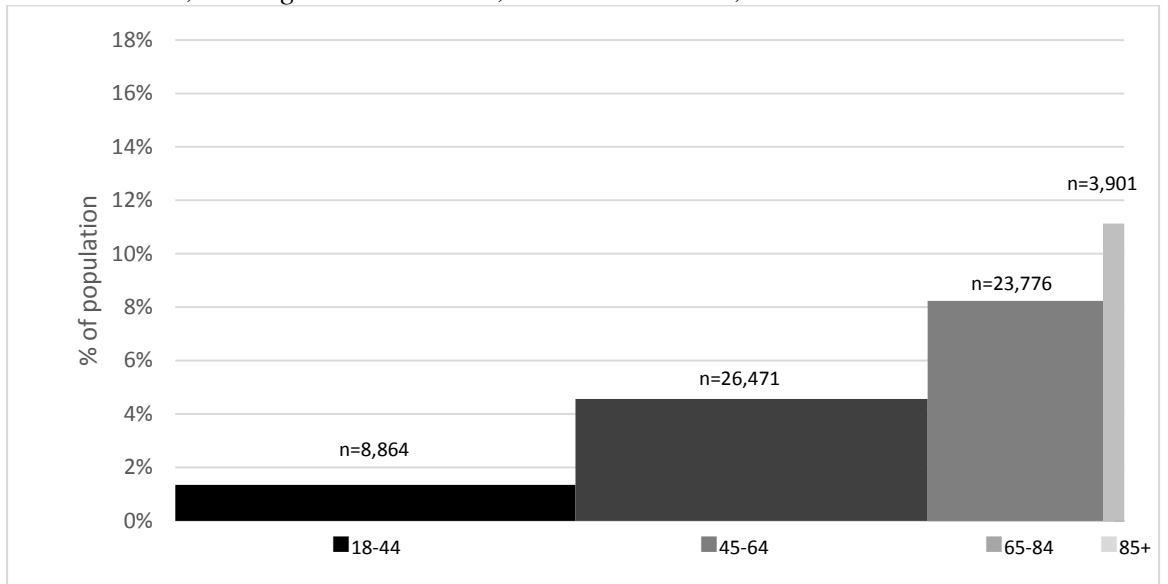

Note: Long-term sedative use defined by the filling of prescriptions containing a total of 90 or more days' supply of sedative during the calendar year. Bar width scaled by population size and n is equal to the number of long-term sedative users in each age group
